# Supplementary material
Source: MDPI journal article supplement (https://www.mdpi.com/2304-6740/5/4/63)

# checkCIF/PLATON report

You have not supplied any structure factors. As a result the full set of tests cannot be run.

THIS REPORT IS FOR GUIDANCE ONLY. IF USED AS PART OF A REVIEW PROCEDURE FOR PUBLICATION, IT SHOULD NOT REPLACE THE EXPERTISE OF AN EXPERIENCED CRYSTALLOGRAPHIC REFEREE.

No syntax errors found.      CIF dictionary      Interpreting this report

## Datablock: Compound1

---

Bond precision:    C-C = 0.0204 Å                      Wavelength=1.54183

Cell:                      a=20.2893(5)              b=20.2893(5)              c=15.0224(4)  
                            alpha=90                      beta=90                      gamma=90  
Temperature:              298 K

|                | Calculated                   | Reported           |
|----------------|------------------------------|--------------------|
| Volume         | 6184.1(3)                    | 6184.1(3)          |
| Space group    | I 41/a                       | I 41/a             |
| Hall group     | -I 4ad                       | -I 4ad             |
| Moiety formula | C112 Fe4 N48 Nb2 O16, 4(O) ? |                    |
| Sum formula    | C112 Fe4 N48 Nb2 O20         | C56 Fe2 N24 Nb O10 |
| Mr             | 2746.82                      | 1373.35            |
| Dx,g cm-3      | 1.475                        | 1.480              |
| Z              | 2                            | 4                  |
| Mu (mm-1)      | 5.855                        | 0.000              |
| F000           | 2708.0                       | 2708.0             |
| F000'          | 2706.84                      |                    |
| h,k,lmax       | 15,15,11                     | 15,15,11           |
| Nref           | 664                          | 662                |
| Tmin,Tmax      |                              |                    |
| Tmin'          |                              |                    |

Correction method= Not given

Data completeness= 0.997                      Theta(max)= 35.000

R(reflections)=                      wR2(reflections)=

S =                                      Npar=

---

The following ALERTS were generated. Each ALERT has the format  
**test-name\_ALERT\_alert-type\_alert-level.**  
Click on the hyperlinks for more details of the test.

---

### 🟡 Alert level B

POWD004\_ALERT\_1\_B No 'Bragg' R factor has been given. Please supply a value  
for \_refine\_ls\_R\_factor\_all [R(F)], refine\_ls\_R\_Fsqd\_factor  
[R(F^2)] or \_refine\_ls\_R\_I\_factor [R(I)].

PLAT242\_ALERT\_2\_B Low 'MainMol' Ueq as Compared to Neighbors of Nb1 Check  
PLAT306\_ALERT\_2\_B Isolated Oxygen Atom (H-atoms Missing ?) ..... 01 Check  
PLAT342\_ALERT\_3\_B Low Bond Precision on C-C Bonds ..... 0.0204 Ang.

---

### 🟢 Alert level C

PLAT241\_ALERT\_2\_C High 'MainMol' Ueq as Compared to Neighbors of C1 Check  
PLAT241\_ALERT\_2\_C High 'MainMol' Ueq as Compared to Neighbors of C2 Check  
PLAT242\_ALERT\_2\_C Low 'MainMol' Ueq as Compared to Neighbors of Fe1 Check

---

### 🟠 Alert level G

PLAT040\_ALERT\_1\_G No H-atoms in this Carbon Containing Compound .. Please Check  
PLAT045\_ALERT\_1\_G Calculated and Reported Z Differ by a Factor ... 0.50 Check  
PLAT304\_ALERT\_4\_G Non-Integer Number of Atoms ( 113.75) in Resd. # 1 Check  
PLAT304\_ALERT\_4\_G Non-Integer Number of Atoms ( 0.50) in Resd. # 2 Check  
PLAT432\_ALERT\_2\_G Short Inter X...Y Contact O1 .. C6 .. 2.40 Ang.  
PLAT432\_ALERT\_2\_G Short Inter X...Y Contact O1 .. C6 .. 2.40 Ang.  
PLAT432\_ALERT\_2\_G Short Inter X...Y Contact O1 .. C8 .. 2.97 Ang.  
PLAT432\_ALERT\_2\_G Short Inter X...Y Contact O1 .. C8 .. 2.97 Ang.  
PLAT432\_ALERT\_2\_G Short Inter X...Y Contact N5 .. C14 .. 2.80 Ang.  
PLAT794\_ALERT\_5\_G Tentative Bond Valency for Fe1 (II) ..... 1.93 Info  
PLAT860\_ALERT\_3\_G Number of Least-Squares Restraints ..... 68 Note  
PLAT982\_ALERT\_1\_G The C-f' = 0.017 Deviates from the IT-value 0.018 Check  
PLAT982\_ALERT\_1\_G The Fe-f' = -1.187 Deviates from the IT-value -1.134 Check  
PLAT982\_ALERT\_1\_G The N-f' = 0.029 Deviates from the IT-value 0.031 Check  
PLAT982\_ALERT\_1\_G The Nb-f' = -0.246 Deviates from the IT-value -0.112 Check  
PLAT982\_ALERT\_1\_G The O-f' = 0.046 Deviates from the IT-value 0.049 Check  
PLAT983\_ALERT\_1\_G The Fe-f" = 3.202 Deviates from the IT-Value 3.197 Check  
PLAT983\_ALERT\_1\_G The Nb-f" = 2.485 Deviates from the IT-Value 2.483 Check

---

- 0 **ALERT level A** = Most likely a serious problem - resolve or explain  
4 **ALERT level B** = A potentially serious problem, consider carefully  
3 **ALERT level C** = Check. Ensure it is not caused by an omission or oversight  
18 **ALERT level G** = General information/check it is not something unexpected
- 10 ALERT type 1 CIF construction/syntax error, inconsistent or missing data  
10 ALERT type 2 Indicator that the structure model may be wrong or deficient  
2 ALERT type 3 Indicator that the structure quality may be low  
2 ALERT type 4 Improvement, methodology, query or suggestion  
1 ALERT type 5 Informative message, check
- 

## Datablock: Compound2

---

Bond precision: C-C = 0.0196 A

Wavelength=1.54183

Cell: a=20.2683(5) b=20.2683(5) c=15.0156(5)  
alpha=90 beta=90 gamma=90

Temperature: 298 K

|                | Calculated                              | Reported                        |
|----------------|-----------------------------------------|---------------------------------|
| Volume         | 6168.5(4)                               | 6168.5(3)                       |
| Space group    | I 41/a                                  | I 41/a                          |
| Hall group     | -I 4ad                                  | -I 4ad                          |
| Moiety formula | C224 Co0.64 Fe7.36 N96 Nb4<br>O32, 8(O) | ?                               |
| Sum formula    | C224 Co0.64 Fe7.36 N96 Nb4<br>O40       | C56 Co0.16 Fe1.84 N24 Nb<br>O10 |
| Mr             | 5495.61                                 | 1373.84                         |
| Dx,g cm-3      | 1.479                                   | 1.480                           |
| Z              | 1                                       | 4                               |
| Mu (mm-1)      | 5.906                                   | 0.000                           |
| F000           | 2708.6                                  | 2708.6                          |
| F000'          | 2706.69                                 |                                 |
| h,k,lmax       | 15,15,11                                | 15,15,11                        |
| Nref           | 663                                     | 662                             |
| Tmin,Tmax      |                                         |                                 |
| Tmin'          |                                         |                                 |

Correction method= Not given

Data completeness= 0.998                      Theta(max)= 35.000

R(reflections)=                      wR2(reflections)=

S =                      Npar=

The following ALERTS were generated. Each ALERT has the format

**test-name\_ALERT\_alert-type\_alert-level.**

Click on the hyperlinks for more details of the test.

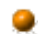

#### Alert level B

POWD004\_ALERT\_1\_B No 'Bragg' R factor has been given. Please supply a value  
for \_refine\_ls\_R\_factor\_all [R(F)], refine\_ls\_R\_Fsqd\_factor  
[R(F^2)] or \_refine\_ls\_R\_I\_factor [R(I)].

|                                                            |                                           |           |
|------------------------------------------------------------|-------------------------------------------|-----------|
| PLAT242_ALERT_2_B Low                                      | 'MainMol' Ueq as Compared to Neighbors of | Nb1 Check |
| PLAT306_ALERT_2_B Isolated Oxygen Atom (H-atoms Missing ?) | .....                                     | O1 Check  |

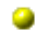

#### Alert level C

|                                                                    |                                                    |
|--------------------------------------------------------------------|----------------------------------------------------|
| PLAT077_ALERT_4_C Unitcell contains non-integer number of atoms .. | Please Check                                       |
| PLAT241_ALERT_2_C High                                             | 'MainMol' Ueq as Compared to Neighbors of C1 Check |
| PLAT241_ALERT_2_C High                                             | 'MainMol' Ueq as Compared to Neighbors of C2 Check |
| PLAT342_ALERT_3_C Low Bond Precision on C-C Bonds .....            | 0.0196 Ang.                                        |

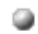

#### Alert level G

|                                                                    |                              |
|--------------------------------------------------------------------|------------------------------|
| PLAT040_ALERT_1_G No H-atoms in this Carbon Containing Compound .. | Please Check                 |
| PLAT045_ALERT_1_G Calculated and Reported Z Differ by a Factor ... | 0.25 Check                   |
| PLAT300_ALERT_4_G Atom Site Occupancy of Fe1                       | is Constrained at 0.92 Check |
| PLAT300_ALERT_4_G Atom Site Occupancy of Co1                       | is Constrained at 0.08 Check |
| PLAT301_ALERT_3_G Main Residue Disorder .....                      | (Resd 1).. 3% Note           |

|                   |                                                  |        |       |
|-------------------|--------------------------------------------------|--------|-------|
| PLAT304_ALERT_4_G | Non-Integer Number of Atoms ( 113.75) in Resd. # | 1      | Check |
| PLAT304_ALERT_4_G | Non-Integer Number of Atoms ( 0.50) in Resd. #   | 2      | Check |
| PLAT432_ALERT_2_G | Short Inter X...Y Contact O1 .. C6 ..            | 2.40   | Ang.  |
| PLAT432_ALERT_2_G | Short Inter X...Y Contact O1 .. C6 ..            | 2.40   | Ang.  |
| PLAT432_ALERT_2_G | Short Inter X...Y Contact O1 .. C8 ..            | 2.99   | Ang.  |
| PLAT432_ALERT_2_G | Short Inter X...Y Contact O1 .. C8 ..            | 2.99   | Ang.  |
| PLAT432_ALERT_2_G | Short Inter X...Y Contact O2 .. C6 ..            | 2.96   | Ang.  |
| PLAT432_ALERT_2_G | Short Inter X...Y Contact N5 .. C14 ..           | 2.77   | Ang.  |
| PLAT860_ALERT_3_G | Number of Least-Squares Restraints .....         | 65     | Note  |
| PLAT982_ALERT_1_G | The C-f' = 0.017 Deviates from the IT-value      | 0.018  | Check |
| PLAT982_ALERT_1_G | The Co-f' = -2.436 Deviates from the IT-value    | -2.365 | Check |
| PLAT982_ALERT_1_G | The Fe-f' = -1.187 Deviates from the IT-value    | -1.134 | Check |
| PLAT982_ALERT_1_G | The N-f' = 0.029 Deviates from the IT-value      | 0.031  | Check |
| PLAT982_ALERT_1_G | The Nb-f' = -0.246 Deviates from the IT-value    | -0.112 | Check |
| PLAT982_ALERT_1_G | The O-f' = 0.046 Deviates from the IT-value      | 0.049  | Check |
| PLAT983_ALERT_1_G | The Co-f" = 3.620 Deviates from the IT-Value     | 3.614  | Check |
| PLAT983_ALERT_1_G | The Fe-f" = 3.202 Deviates from the IT-Value     | 3.197  | Check |
| PLAT983_ALERT_1_G | The Nb-f" = 2.485 Deviates from the IT-Value     | 2.483  | Check |

---

0 **ALERT level A** = Most likely a serious problem - resolve or explain  
 3 **ALERT level B** = A potentially serious problem, consider carefully  
 4 **ALERT level C** = Check. Ensure it is not caused by an omission or oversight  
 23 **ALERT level G** = General information/check it is not something unexpected

12 ALERT type 1 CIF construction/syntax error, inconsistent or missing data  
 10 ALERT type 2 Indicator that the structure model may be wrong or deficient  
 3 ALERT type 3 Indicator that the structure quality may be low  
 5 ALERT type 4 Improvement, methodology, query or suggestion  
 0 ALERT type 5 Informative message, check

---

## Datablock: Compound3

---

Bond precision: C-C = 0.0189 A

Wavelength=1.54183

Cell: a=20.2572(6) b=20.2572(6) c=15.0154(6)  
 alpha=90 beta=90 gamma=90

Temperature: 298 K

|                | Calculated                              | Reported                        |
|----------------|-----------------------------------------|---------------------------------|
| Volume         | 6161.6(4)                               | 6161.6(3)                       |
| Space group    | I 41/a                                  | I 41/a                          |
| Hall group     | -I 4ad                                  | -I 4ad                          |
| Moiety formula | C224 Co2.32 Fe5.68 N96 Nb4<br>O32, 8(O) | ?<br>?                          |
| Sum formula    | C224 Co2.32 Fe5.68 N96 Nb4<br>O40       | C56 Co0.58 Fe1.42 N24 Nb<br>O10 |
| Mr             | 5500.79                                 | 1375.14                         |
| Dx,g cm-3      | 1.482                                   | 1.480                           |
| Z              | 1                                       | 4                               |
| Mu (mm-1)      | 6.005                                   | 0.000                           |
| F000           | 2710.3                                  | 2710.3                          |
| F000'          | 2706.31                                 |                                 |
| h,k,lmax       | 15,15,11                                | 15,15,11                        |
| Nref           | 663                                     | 661                             |
| Tmin,Tmax      |                                         |                                 |
| Tmin'          |                                         |                                 |

Correction method= Not given

Data completeness= 0.997                      Theta(max)= 35.000

R(reflections)=                                      wR2(reflections)=

S =                                                      Npar=

The following ALERTS were generated. Each ALERT has the format

**test-name\_ALERT\_alert-type\_alert-level.**

Click on the hyperlinks for more details of the test.



#### Alert level B

POWD004\_ALERT\_1\_B No 'Bragg' R factor has been given. Please supply a value  
for \_refine\_ls\_R\_factor\_all [R(F)], refine\_ls\_R\_Fsqd\_factor  
[R(F^2)] or \_refine\_ls\_R\_I\_factor [R(I)].

PLAT242\_ALERT\_2\_B Low 'MainMol' Ueq as Compared to Neighbors of                      Nb1 Check  
PLAT306\_ALERT\_2\_B Isolated Oxygen Atom (H-atoms Missing ?) .....                      O1 Check

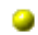

#### Alert level C

PLAT077\_ALERT\_4\_C Unitcell contains non-integer number of atoms ..                      Please Check  
PLAT241\_ALERT\_2\_C High 'MainMol' Ueq as Compared to Neighbors of                      N1 Check  
PLAT241\_ALERT\_2\_C High 'MainMol' Ueq as Compared to Neighbors of                      C1 Check  
PLAT241\_ALERT\_2\_C High 'MainMol' Ueq as Compared to Neighbors of                      C2 Check  
PLAT342\_ALERT\_3\_C Low Bond Precision on C-C Bonds .....                      0.0189 Ang.

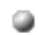

#### Alert level G

PLAT040\_ALERT\_1\_G No H-atoms in this Carbon Containing Compound ..                      Please Check  
PLAT045\_ALERT\_1\_G Calculated and Reported Z Differ by a Factor ...                      0.25 Check  
PLAT300\_ALERT\_4\_G Atom Site Occupancy of Fe1 is Constrained at                      0.71 Check  
PLAT300\_ALERT\_4\_G Atom Site Occupancy of Co1 is Constrained at                      0.29 Check

|                   |                                                  |                                   |        |       |
|-------------------|--------------------------------------------------|-----------------------------------|--------|-------|
| PLAT301_ALERT_3_G | Main Residue Disorder .....                      | (Resd 1) ..                       | 3%     | Note  |
| PLAT304_ALERT_4_G | Non-Integer Number of Atoms ( 113.75) in Resd. # |                                   | 1      | Check |
| PLAT304_ALERT_4_G | Non-Integer Number of Atoms ( 0.50) in Resd. #   |                                   | 2      | Check |
| PLAT432_ALERT_2_G | Short Inter X...Y Contact                        | O1 .. C6 ..                       | 2.40   | Ang.  |
| PLAT432_ALERT_2_G | Short Inter X...Y Contact                        | O1 .. C6 ..                       | 2.40   | Ang.  |
| PLAT432_ALERT_2_G | Short Inter X...Y Contact                        | O1 .. C8 ..                       | 3.00   | Ang.  |
| PLAT432_ALERT_2_G | Short Inter X...Y Contact                        | O1 .. C8 ..                       | 3.00   | Ang.  |
| PLAT432_ALERT_2_G | Short Inter X...Y Contact                        | N5 .. C14 ..                      | 2.78   | Ang.  |
| PLAT860_ALERT_3_G | Number of Least-Squares Restraints .....         |                                   | 59     | Note  |
| PLAT982_ALERT_1_G | The C-f' =                                       | 0.017 Deviates from the IT-value  | 0.018  | Check |
| PLAT982_ALERT_1_G | The Co-f' =                                      | -2.436 Deviates from the IT-value | -2.365 | Check |
| PLAT982_ALERT_1_G | The Fe-f' =                                      | -1.187 Deviates from the IT-value | -1.134 | Check |
| PLAT982_ALERT_1_G | The N-f' =                                       | 0.029 Deviates from the IT-value  | 0.031  | Check |
| PLAT982_ALERT_1_G | The Nb-f' =                                      | -0.246 Deviates from the IT-value | -0.112 | Check |
| PLAT982_ALERT_1_G | The O-f' =                                       | 0.046 Deviates from the IT-value  | 0.049  | Check |
| PLAT983_ALERT_1_G | The Co-f" =                                      | 3.620 Deviates from the IT-Value  | 3.614  | Check |
| PLAT983_ALERT_1_G | The Fe-f" =                                      | 3.202 Deviates from the IT-Value  | 3.197  | Check |
| PLAT983_ALERT_1_G | The Nb-f" =                                      | 2.485 Deviates from the IT-Value  | 2.483  | Check |

---

0 **ALERT level A** = Most likely a serious problem - resolve or explain  
 3 **ALERT level B** = A potentially serious problem, consider carefully  
 5 **ALERT level C** = Check. Ensure it is not caused by an omission or oversight  
 22 **ALERT level G** = General information/check it is not something unexpected

12 ALERT type 1 CIF construction/syntax error, inconsistent or missing data  
 10 ALERT type 2 Indicator that the structure model may be wrong or deficient  
 3 ALERT type 3 Indicator that the structure quality may be low  
 5 ALERT type 4 Improvement, methodology, query or suggestion  
 0 ALERT type 5 Informative message, check

---

## Datablock: Compound4

---

|                 |                |                           |
|-----------------|----------------|---------------------------|
| Bond precision: | C-C = 0.0199 A | Wavelength=1.54183        |
| Cell:           | a=20.2453(8)   | b=20.2453(8) c=15.0151(8) |
|                 | alpha=90       | beta=90 gamma=90          |
| Temperature:    | 298 K          |                           |

|                | Calculated                        | Reported               |
|----------------|-----------------------------------|------------------------|
| Volume         | 6154.3(6)                         | 6154.2(5)              |
| Space group    | I 41/a                            | I 41/a                 |
| Hall group     | -I 4ad                            | -I 4ad                 |
| Moiety formula | C112 Co2 Fe2 N48 Nb2 O16,<br>4(O) | ?                      |
| Sum formula    | C112 Co2 Fe2 N48 Nb2 O20          | C56 Co1 Fe1 N24 Nb O10 |
| Mr             | 2752.98                           | 1376.44                |
| Dx,g cm-3      | 1.486                             | 1.490                  |
| Z              | 2                                 | 4                      |
| Mu (mm-1)      | 6.105                             | 0.000                  |
| F000           | 2712.0                            | 2712.0                 |
| F000'          | 2705.93                           |                        |
| h,k,lmax       | 15,15,11                          | 15,15,11               |
| Nref           | 663                               | 661                    |
| Tmin,Tmax      |                                   |                        |
| Tmin'          |                                   |                        |

Correction method= Not given

Data completeness= 0.997                      Theta(max)= 35.000

R(reflections)=                                      wR2(reflections)=

S =                                                      Npar=

The following ALERTS were generated. Each ALERT has the format

**test-name\_ALERT\_alert-type\_alert-level.**

Click on the hyperlinks for more details of the test.

### Alert level B

POWD004\_ALERT\_1\_B No 'Bragg' R factor has been given. Please supply a value  
for \_refine\_ls\_R\_factor\_all [R(F)], refine\_ls\_R\_Fsqd\_factor  
[R(F^2)] or \_refine\_ls\_R\_I\_factor [R(I)].

|                                                            |                                           |           |
|------------------------------------------------------------|-------------------------------------------|-----------|
| PLAT242_ALERT_2_B Low                                      | 'MainMol' Ueq as Compared to Neighbors of | Nb1 Check |
| PLAT306_ALERT_2_B Isolated Oxygen Atom (H-atoms Missing ?) | .....                                     | O1 Check  |

### Alert level C

|                                         |                                           |             |
|-----------------------------------------|-------------------------------------------|-------------|
| PLAT076_ALERT_1_C Occupancy             | 0.500 less than 1.0 for Sp.pos            | FE1         |
| PLAT076_ALERT_1_C Occupancy             | 0.500 less than 1.0 for Sp.pos            | CO1         |
| PLAT241_ALERT_2_C High                  | 'MainMol' Ueq as Compared to Neighbors of | C1 Check    |
| PLAT241_ALERT_2_C High                  | 'MainMol' Ueq as Compared to Neighbors of | C2 Check    |
| PLAT342_ALERT_3_C Low Bond Precision on | C-C Bonds .....                           | 0.0199 Ang. |

### Alert level G

|                                                                    |              |
|--------------------------------------------------------------------|--------------|
| PLAT040_ALERT_1_G No H-atoms in this Carbon Containing Compound .. | Please Check |
| PLAT045_ALERT_1_G Calculated and Reported Z Differ by a Factor ... | 0.50 Check   |
| PLAT300_ALERT_4_G Atom Site Occupancy of Co1 is Constrained at     | 0.5 Check    |
| PLAT300_ALERT_4_G Atom Site Occupancy of Fe1 is Constrained at     | 0.5 Check    |
| PLAT301_ALERT_3_G Main Residue Disorder .....(Resd 1)..            | 2% Note      |

|                   |                                                  |        |       |
|-------------------|--------------------------------------------------|--------|-------|
| PLAT304_ALERT_4_G | Non-Integer Number of Atoms ( 113.75) in Resd. # | 1      | Check |
| PLAT304_ALERT_4_G | Non-Integer Number of Atoms ( 0.50) in Resd. #   | 2      | Check |
| PLAT432_ALERT_2_G | Short Inter X...Y Contact O1 .. C6 ..            | 2.38   | Ang.  |
| PLAT432_ALERT_2_G | Short Inter X...Y Contact O1 .. C6 ..            | 2.38   | Ang.  |
| PLAT432_ALERT_2_G | Short Inter X...Y Contact O1 .. C8 ..            | 3.01   | Ang.  |
| PLAT432_ALERT_2_G | Short Inter X...Y Contact O1 .. C8 ..            | 3.01   | Ang.  |
| PLAT432_ALERT_2_G | Short Inter X...Y Contact O2 .. C6 ..            | 2.94   | Ang.  |
| PLAT432_ALERT_2_G | Short Inter X...Y Contact N5 .. C14 ..           | 2.79   | Ang.  |
| PLAT860_ALERT_3_G | Number of Least-Squares Restraints .....         | 59     | Note  |
| PLAT982_ALERT_1_G | The C-f' = 0.017 Deviates from the IT-value      | 0.018  | Check |
| PLAT982_ALERT_1_G | The Co-f' = -2.436 Deviates from the IT-value    | -2.365 | Check |
| PLAT982_ALERT_1_G | The Fe-f' = -1.187 Deviates from the IT-value    | -1.134 | Check |
| PLAT982_ALERT_1_G | The N-f' = 0.029 Deviates from the IT-value      | 0.031  | Check |
| PLAT982_ALERT_1_G | The Nb-f' = -0.246 Deviates from the IT-value    | -0.112 | Check |
| PLAT982_ALERT_1_G | The O-f' = 0.046 Deviates from the IT-value      | 0.049  | Check |
| PLAT983_ALERT_1_G | The Co-f" = 3.620 Deviates from the IT-Value     | 3.614  | Check |
| PLAT983_ALERT_1_G | The Fe-f" = 3.202 Deviates from the IT-Value     | 3.197  | Check |
| PLAT983_ALERT_1_G | The Nb-f" = 2.485 Deviates from the IT-Value     | 2.483  | Check |

---

0 **ALERT level A** = Most likely a serious problem - resolve or explain  
 3 **ALERT level B** = A potentially serious problem, consider carefully  
 5 **ALERT level C** = Check. Ensure it is not caused by an omission or oversight  
 23 **ALERT level G** = General information/check it is not something unexpected

14 ALERT type 1 CIF construction/syntax error, inconsistent or missing data  
 10 ALERT type 2 Indicator that the structure model may be wrong or deficient  
 3 ALERT type 3 Indicator that the structure quality may be low  
 4 ALERT type 4 Improvement, methodology, query or suggestion  
 0 ALERT type 5 Informative message, check

---

## Datablock: Compound5

---

Bond precision: C-C = 0.0206 A

Wavelength=1.54183

|              |               |               |               |
|--------------|---------------|---------------|---------------|
| Cell:        | a=20.2238(11) | b=20.2238(11) | c=15.0065(13) |
|              | alpha=90      | beta=90       | gamma=90      |
| Temperature: | 298 K         |               |               |

|                | Calculated                              | Reported                        |
|----------------|-----------------------------------------|---------------------------------|
| Volume         | 6137.7(9)                               | 6137.7(7)                       |
| Space group    | I 41/a                                  | I 41/a                          |
| Hall group     | -I 4ad                                  | -I 4ad                          |
| Moiety formula | C224 Co6.32 Fe1.68 N96 Nb4<br>O32, 8(O) | ?                               |
| Sum formula    | C224 Co6.32 Fe1.68 N96 Nb4<br>O40       | C56 Co1.58 Fe0.42 N24 Nb<br>O10 |
| Mr             | 5513.11                                 | 1378.23                         |
| Dx,g cm-3      | 1.492                                   | 1.490                           |
| Z              | 1                                       | 4                               |
| Mu (mm-1)      | 6.250                                   | 0.000                           |
| F000           | 2714.3                                  | 2714.3                          |
| F000'          | 2705.40                                 |                                 |
| h,k,lmax       | 15,15,11                                | 14,14,11                        |
| Nref           | 660                                     | 658                             |
| Tmin,Tmax      |                                         |                                 |
| Tmin'          |                                         |                                 |

Correction method= Not given

Data completeness= 0.997                      Theta(max)= 35.000

R(reflections)=                      wR2(reflections)=

S =                      Npar=

The following ALERTS were generated. Each ALERT has the format

**test-name\_ALERT\_alert-type\_alert-level.**

Click on the hyperlinks for more details of the test.



#### Alert level B

POWD004\_ALERT\_1\_B No 'Bragg' R factor has been given. Please supply a value  
for \_refine\_ls\_R\_factor\_all [R(F)], refine\_ls\_R\_Fsqd\_factor  
[R(F^2)] or \_refine\_ls\_R\_I\_factor [R(I)].

|                                                            |                                           |             |
|------------------------------------------------------------|-------------------------------------------|-------------|
| PLAT242_ALERT_2_B Low                                      | 'MainMol' Ueq as Compared to Neighbors of | Nb1 Check   |
| PLAT306_ALERT_2_B Isolated Oxygen Atom (H-atoms Missing ?) | .....                                     | O1 Check    |
| PLAT342_ALERT_3_B Low Bond Precision on                    | C-C Bonds .....                           | 0.0206 Ang. |

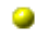

#### Alert level C

|                                                                    |                                                         |
|--------------------------------------------------------------------|---------------------------------------------------------|
| PLAT077_ALERT_4_C Unitcell contains non-integer number of atoms .. | Please Check                                            |
| PLAT241_ALERT_2_C High                                             | 'MainMol' Ueq as Compared to Neighbors of      C1 Check |
| PLAT241_ALERT_2_C High                                             | 'MainMol' Ueq as Compared to Neighbors of      C2 Check |

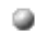

#### Alert level G

|                                                                    |                                   |
|--------------------------------------------------------------------|-----------------------------------|
| PLAT040_ALERT_1_G No H-atoms in this Carbon Containing Compound .. | Please Check                      |
| PLAT045_ALERT_1_G Calculated and Reported Z Differ by a Factor ... | 0.25 Check                        |
| PLAT152_ALERT_1_G The Supplied and Calc. Volume s.u. Differ by ... | 2 Units                           |
| PLAT300_ALERT_4_G Atom Site Occupancy of Co1                       | is Constrained at      0.79 Check |
| PLAT300_ALERT_4_G Atom Site Occupancy of Fe1                       | is Constrained at      0.21 Check |

|                   |                                          |                                   |        |       |
|-------------------|------------------------------------------|-----------------------------------|--------|-------|
| PLAT301_ALERT_3_G | Main Residue Disorder .....              | (Resd 1) ..                       | 3%     | Note  |
| PLAT304_ALERT_4_G | Non-Integer Number of Atoms ( 113.75)    | in Resd. #                        | 1      | Check |
| PLAT304_ALERT_4_G | Non-Integer Number of Atoms ( 0.50)      | in Resd. #                        | 2      | Check |
| PLAT432_ALERT_2_G | Short Inter X...Y Contact                | O1 .. C6 ..                       | 2.32   | Ang.  |
| PLAT432_ALERT_2_G | Short Inter X...Y Contact                | O1 .. C6 ..                       | 2.32   | Ang.  |
| PLAT432_ALERT_2_G | Short Inter X...Y Contact                | O1 .. C8 ..                       | 2.99   | Ang.  |
| PLAT432_ALERT_2_G | Short Inter X...Y Contact                | O1 .. C8 ..                       | 2.99   | Ang.  |
| PLAT432_ALERT_2_G | Short Inter X...Y Contact                | O2 .. C6 ..                       | 2.89   | Ang.  |
| PLAT432_ALERT_2_G | Short Inter X...Y Contact                | N5 .. C14 ..                      | 2.80   | Ang.  |
| PLAT860_ALERT_3_G | Number of Least-Squares Restraints ..... |                                   | 59     | Note  |
| PLAT982_ALERT_1_G | The C-f' =                               | 0.017 Deviates from the IT-value  | 0.018  | Check |
| PLAT982_ALERT_1_G | The Co-f' =                              | -2.436 Deviates from the IT-value | -2.365 | Check |
| PLAT982_ALERT_1_G | The Fe-f' =                              | -1.187 Deviates from the IT-value | -1.134 | Check |
| PLAT982_ALERT_1_G | The N-f' =                               | 0.029 Deviates from the IT-value  | 0.031  | Check |
| PLAT982_ALERT_1_G | The Nb-f' =                              | -0.246 Deviates from the IT-value | -0.112 | Check |
| PLAT982_ALERT_1_G | The O-f' =                               | 0.046 Deviates from the IT-value  | 0.049  | Check |
| PLAT983_ALERT_1_G | The Co-f" =                              | 3.620 Deviates from the IT-Value  | 3.614  | Check |
| PLAT983_ALERT_1_G | The Fe-f" =                              | 3.202 Deviates from the IT-Value  | 3.197  | Check |
| PLAT983_ALERT_1_G | The Nb-f" =                              | 2.485 Deviates from the IT-Value  | 2.483  | Check |

---

0 **ALERT level A** = Most likely a serious problem - resolve or explain  
 4 **ALERT level B** = A potentially serious problem, consider carefully  
 3 **ALERT level C** = Check. Ensure it is not caused by an omission or oversight  
 24 **ALERT level G** = General information/check it is not something unexpected

13 ALERT type 1 CIF construction/syntax error, inconsistent or missing data  
 10 ALERT type 2 Indicator that the structure model may be wrong or deficient  
 3 ALERT type 3 Indicator that the structure quality may be low  
 5 ALERT type 4 Improvement, methodology, query or suggestion  
 0 ALERT type 5 Informative message, check

---

## Datablock: Compound6

---

Bond precision: C-C = 0.0207 A

Wavelength=1.54183

|              |               |               |               |
|--------------|---------------|---------------|---------------|
| Cell:        | a=20.2105(11) | b=20.2105(11) | c=15.0066(13) |
|              | alpha=90      | beta=90       | gamma=90      |
| Temperature: | 298 K         |               |               |

|                | Calculated                   | Reported           |
|----------------|------------------------------|--------------------|
| Volume         | 6129.7(9)                    | 6129.7(7)          |
| Space group    | I 41/a                       | I 41/a             |
| Hall group     | -I 4ad                       | -I 4ad             |
| Moiety formula | C112 Co4 N48 Nb2 O16, 4(O) ? |                    |
| Sum formula    | C112 Co4 N48 Nb2 O20         | C56 Co2 N24 Nb O10 |
| Mr             | 2759.14                      | 1379.53            |
| Dx,g cm-3      | 1.495                        | 1.490              |
| Z              | 2                            | 4                  |
| Mu (mm-1)      | 6.351                        | 0.000              |
| F000           | 2716.0                       | 2716.0             |
| F000'          | 2705.02                      |                    |
| h,k,lmax       | 15,15,11                     | 14,14,11           |
| Nref           | 658                          | 658                |
| Tmin,Tmax      |                              |                    |
| Tmin'          |                              |                    |

Correction method= Not given

Data completeness= 1.000                      Theta(max)= 35.000

R(reflections)=                      wR2(reflections)=

S =                      Npar=

The following ALERTS were generated. Each ALERT has the format

**test-name\_ALERT\_alert-type\_alert-level.**

Click on the hyperlinks for more details of the test.

### Alert level B

POWD004\_ALERT\_1\_B No 'Bragg' R factor has been given. Please supply a value  
for \_refine\_ls\_R\_factor\_all [R(F)], refine\_ls\_R\_Fsqd\_factor  
[R(F^2)] or \_refine\_ls\_R\_I\_factor [R(I)].

PLAT306\_ALERT\_2\_B Isolated Oxygen Atom (H-atoms Missing ?) ..... 01 Check  
PLAT342\_ALERT\_3\_B Low Bond Precision on C-C Bonds ..... 0.0207 Ang.

### Alert level C

PLAT241\_ALERT\_2\_C High 'MainMol' Ueq as Compared to Neighbors of C1 Check  
PLAT241\_ALERT\_2\_C High 'MainMol' Ueq as Compared to Neighbors of C2 Check  
PLAT242\_ALERT\_2\_C Low 'MainMol' Ueq as Compared to Neighbors of Nb1 Check

### Alert level G

PLAT040\_ALERT\_1\_G No H-atoms in this Carbon Containing Compound .. Please Check  
PLAT045\_ALERT\_1\_G Calculated and Reported Z Differ by a Factor ... 0.50 Check  
PLAT152\_ALERT\_1\_G The Supplied and Calc. Volume s.u. Differ by ... 2 Units  
PLAT304\_ALERT\_4\_G Non-Integer Number of Atoms ( 113.75) in Resd. # 1 Check  
PLAT304\_ALERT\_4\_G Non-Integer Number of Atoms ( 0.50) in Resd. # 2 Check  
PLAT432\_ALERT\_2\_G Short Inter X...Y Contact O1 .. C6 .. 2.35 Ang.  
PLAT432\_ALERT\_2\_G Short Inter X...Y Contact O1 .. C6 .. 2.35 Ang.  
PLAT432\_ALERT\_2\_G Short Inter X...Y Contact O1 .. C8 .. 3.02 Ang.

|                   |                                    |        |                   |          |    |        |       |
|-------------------|------------------------------------|--------|-------------------|----------|----|--------|-------|
| PLAT432_ALERT_2_G | Short Inter X...Y Contact          | O1     | ..                | C8       | .. | 3.02   | Ang.  |
| PLAT432_ALERT_2_G | Short Inter X...Y Contact          | O2     | ..                | C6       | .. | 2.89   | Ang.  |
| PLAT432_ALERT_2_G | Short Inter X...Y Contact          | N5     | ..                | C14      | .. | 2.77   | Ang.  |
| PLAT794_ALERT_5_G | Tentative Bond Valency for Co1     | (III)  | .....             |          |    | 1.89   | Info  |
| PLAT860_ALERT_3_G | Number of Least-Squares Restraints | .....  |                   |          |    | 59     | Note  |
| PLAT982_ALERT_1_G | The C-f' =                         | 0.017  | Deviates from the | IT-value |    | 0.018  | Check |
| PLAT982_ALERT_1_G | The Co-f' =                        | -2.436 | Deviates from the | IT-value |    | -2.365 | Check |
| PLAT982_ALERT_1_G | The N-f' =                         | 0.029  | Deviates from the | IT-value |    | 0.031  | Check |
| PLAT982_ALERT_1_G | The Nb-f' =                        | -0.246 | Deviates from the | IT-value |    | -0.112 | Check |
| PLAT982_ALERT_1_G | The O-f' =                         | 0.046  | Deviates from the | IT-value |    | 0.049  | Check |
| PLAT983_ALERT_1_G | The Co-f" =                        | 3.620  | Deviates from the | IT-Value |    | 3.614  | Check |
| PLAT983_ALERT_1_G | The Nb-f" =                        | 2.485  | Deviates from the | IT-Value |    | 2.483  | Check |

---

0 **ALERT level A** = Most likely a serious problem - resolve or explain  
 3 **ALERT level B** = A potentially serious problem, consider carefully  
 3 **ALERT level C** = Check. Ensure it is not caused by an omission or oversight  
 20 **ALERT level G** = General information/check it is not something unexpected

11 ALERT type 1 CIF construction/syntax error, inconsistent or missing data  
 10 ALERT type 2 Indicator that the structure model may be wrong or deficient  
 2 ALERT type 3 Indicator that the structure quality may be low  
 2 ALERT type 4 Improvement, methodology, query or suggestion  
 1 ALERT type 5 Informative message, check

---

## checkCIF publication errors

---

### Alert level G

PUBL017\_ALERT\_1\_G The \_publ\_section\_references section is missing or empty.

---

0 **ALERT level A** = Data missing that is essential or data in wrong format  
 1 **ALERT level G** = General alerts. Data that may be required is missing

---

## Publication of your CIF

You should attempt to resolve as many as possible of the alerts in all categories. Often the minor alerts point to easily fixed oversights, errors and omissions in your CIF or refinement strategy, so attention to these fine details can be worthwhile. In order to resolve some of the more serious problems it may be necessary to carry out additional measurements or structure refinements. However, the nature of your study may justify the reported deviations from journal submission requirements and the more serious of these should be commented upon in the discussion or experimental section of a paper or in the "special\_details" fields of the CIF. *checkCIF* was carefully designed to identify outliers and unusual parameters, but every test has its limitations and alerts that are not important in a particular case may appear. Conversely, the absence of alerts does not guarantee there are no aspects of the results needing attention. It is up to the individual to critically assess their own results and, if necessary, seek expert advice.

If you wish to submit your CIF for publication in Acta Crystallographica Section C or E, you should upload your CIF via the web. If you wish to submit your CIF for publication in IUCrData you should upload your CIF via the web. If your CIF is to form part of a submission to another IUCr journal, you will be asked, either during electronic submission or by the Co-editor handling your paper, to upload your CIF via our web site.

---

**PLATON version of 13/08/2017; check.def file version of 27/07/2017**

Datablock Compound1 - ellipsoid plot

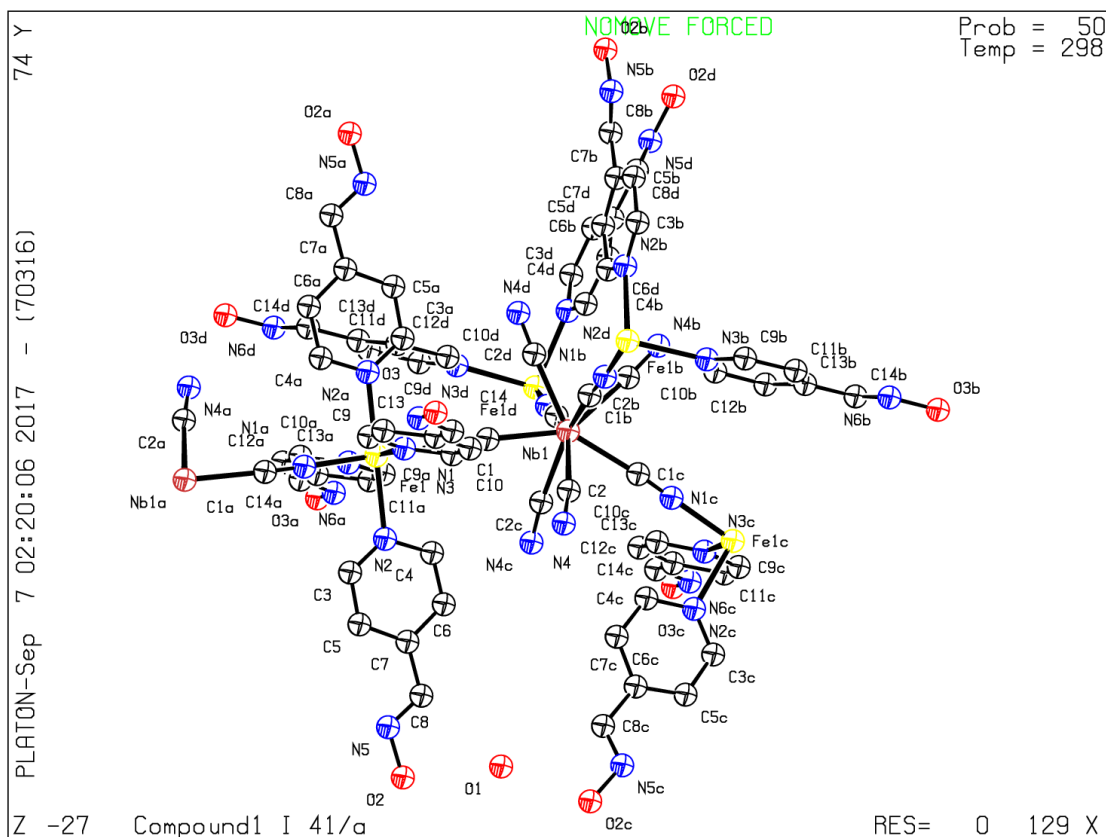

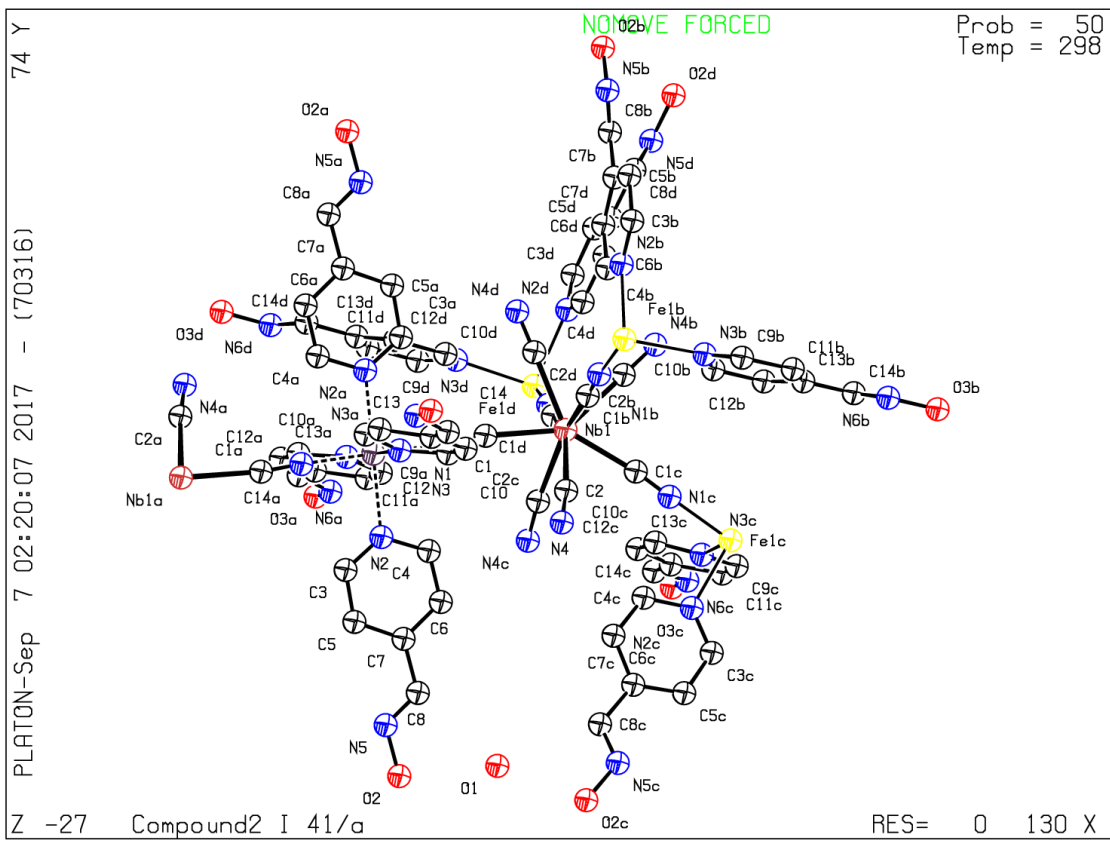

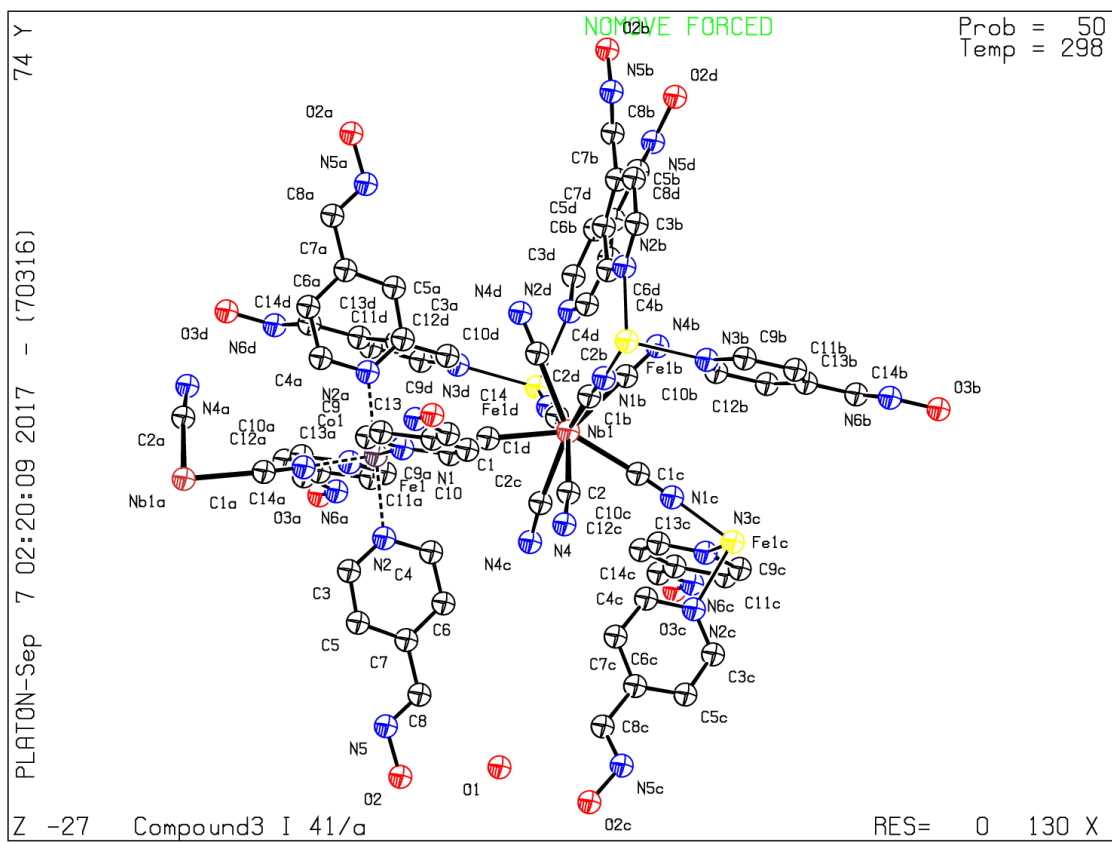

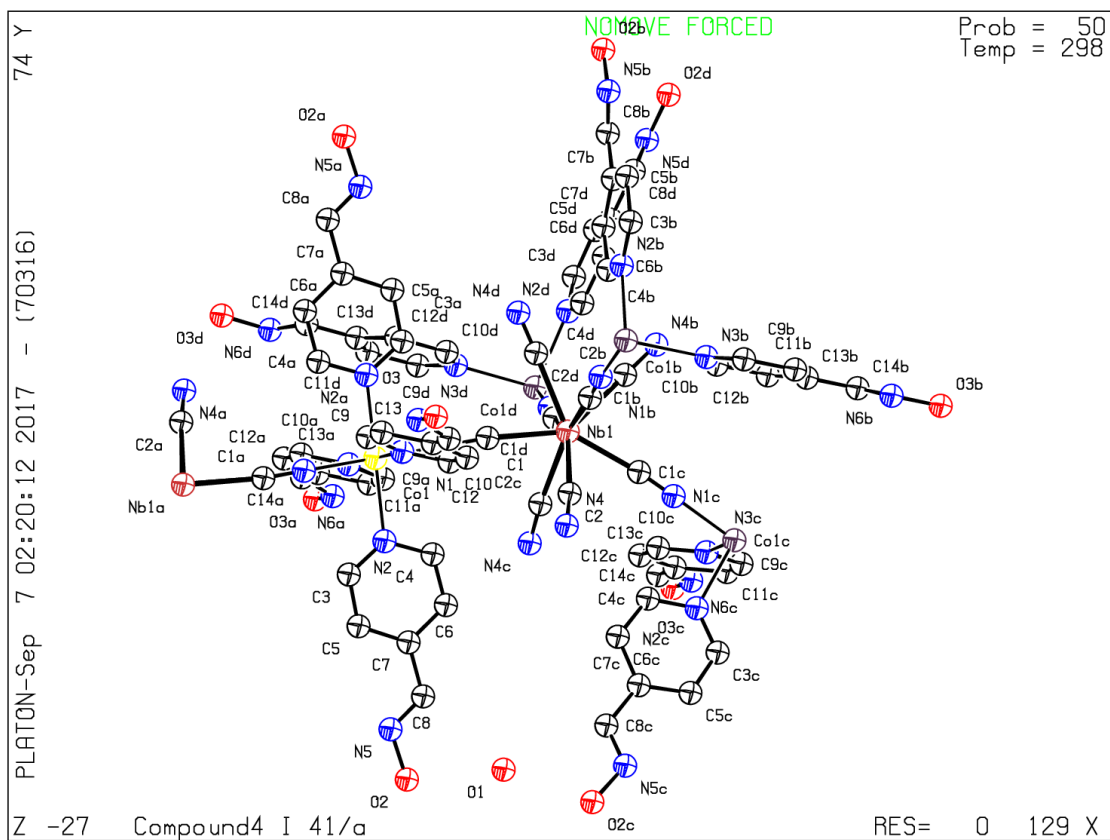

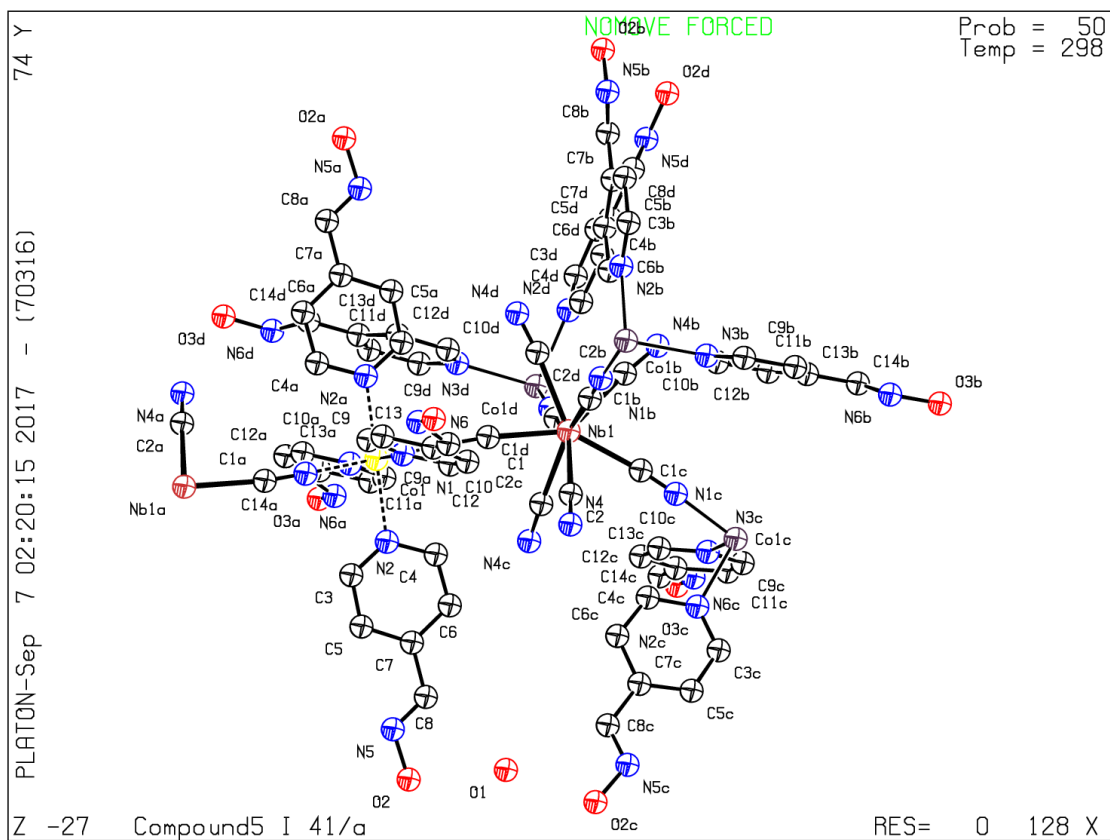

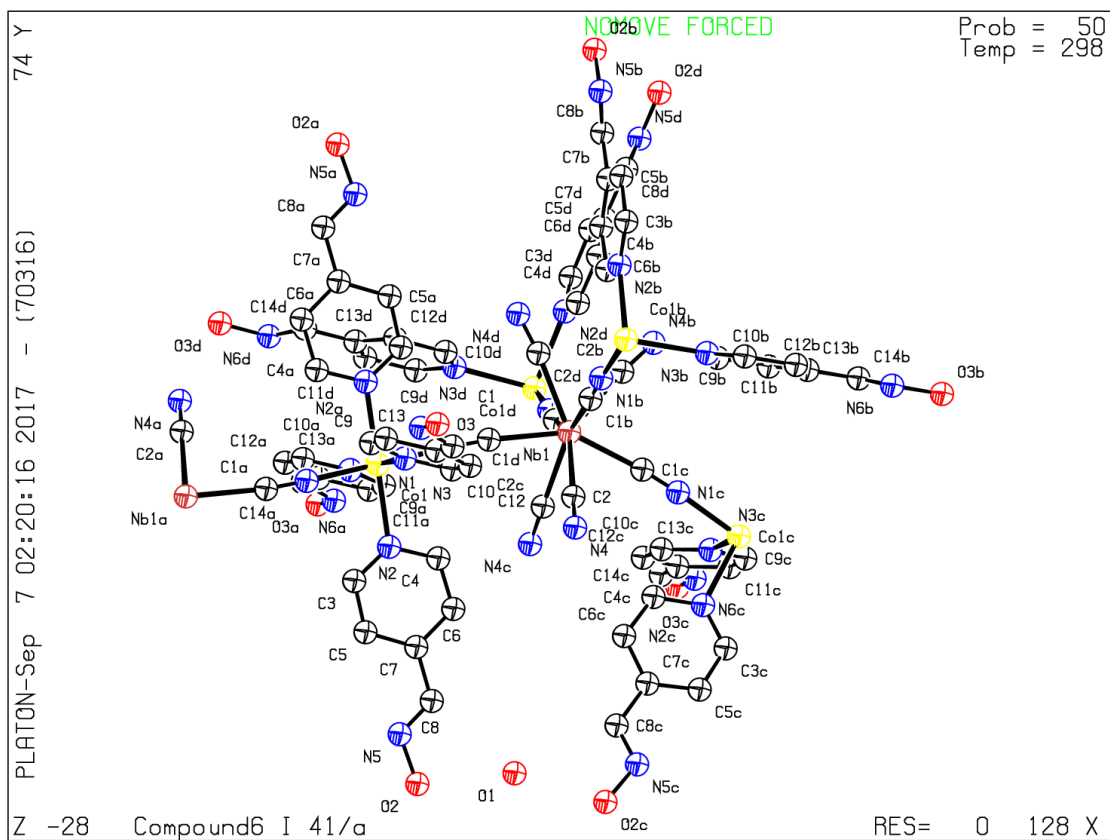

Supplement: s1 [file s1]
