# Supplementary material
Source: MDPI journal article supplement (https://www.mdpi.com/2304-6740/5/4/63)
Supplement: s1 [file s1]

# Metal-substitution effect on a cyanido-bridged three-dimensional spin-crossover system

Kenta Imoto,<sup>1</sup> Shinjiro Takano,<sup>1</sup> and Shin-ichi Ohkoshi<sup>1,2</sup>

<sup>1</sup> *Department of Chemistry, School of Science, The University of Tokyo,*

*7-3-1 Hongo, Bunkyo-ku, Tokyo 113-0033, Japan*

<sup>2</sup> *Cryogenic Research Center, The University of Tokyo,*

*2-11-16 Yayoi, Bunkyo-ku, Tokyo 113-0032, Japan*

\*Correspondence should be addressed to S. O.  
ohkoshi@chem.s.u-tokyo.ac.jp

| Contents:                                                                                                       | Page |
|-----------------------------------------------------------------------------------------------------------------|------|
| § 1 SEM images and particle size distributions of <b>1-6</b> .-----Figure S1                                    | S2   |
| § 2 Co fraction ( <i>x</i> ) dependence of spin-crossover transition temperature of <b>1-5</b> . -----Figure S2 | S3   |

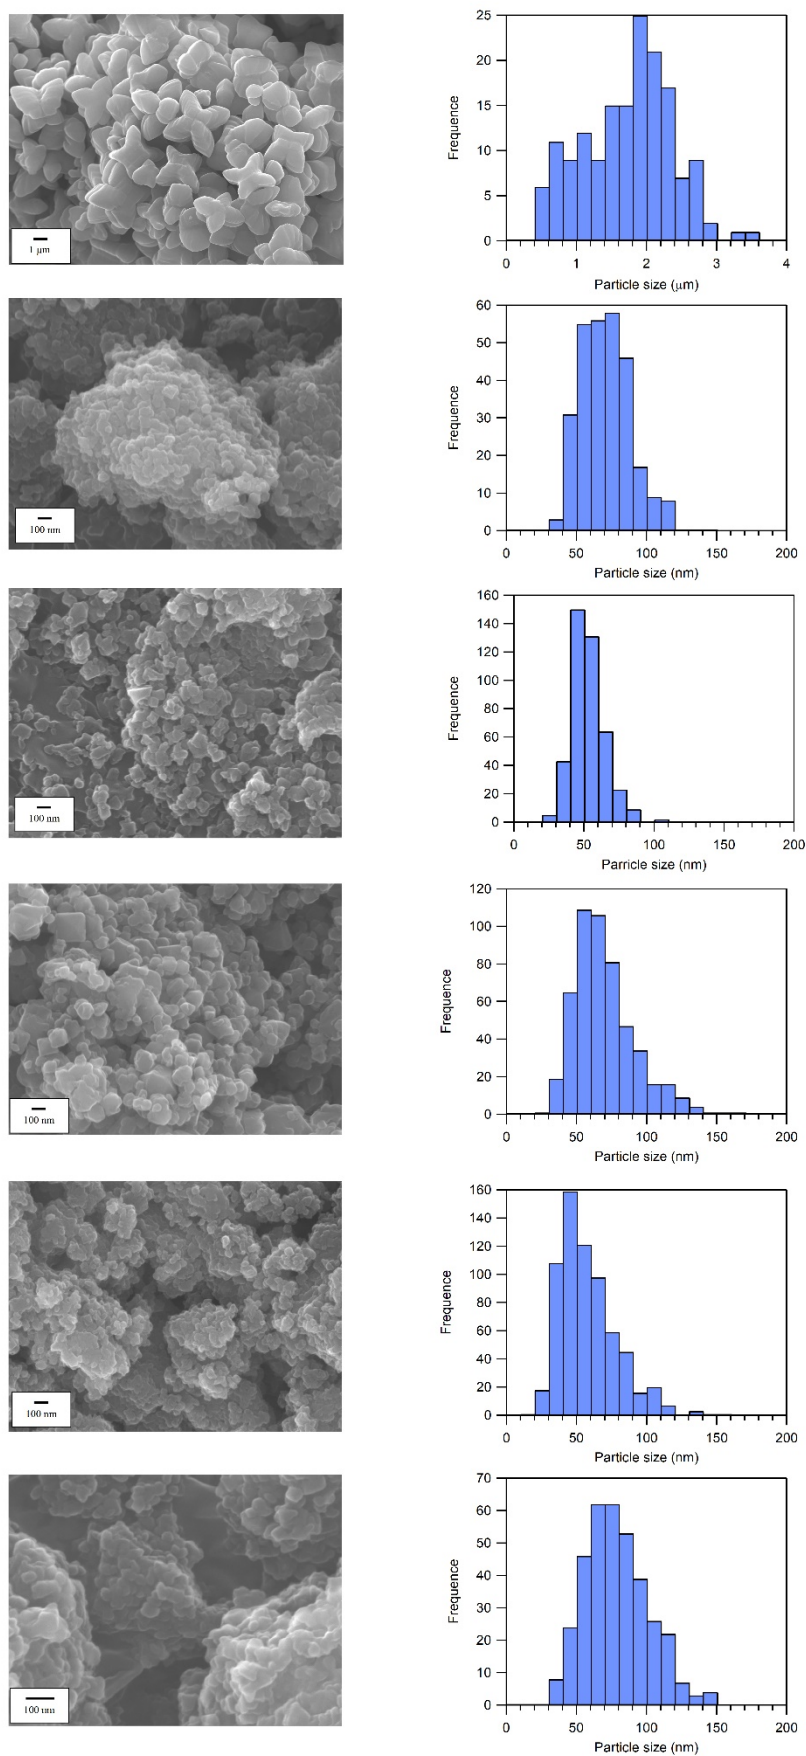

**Figure S1.** SEM images and particle size distributions of **1–6**.

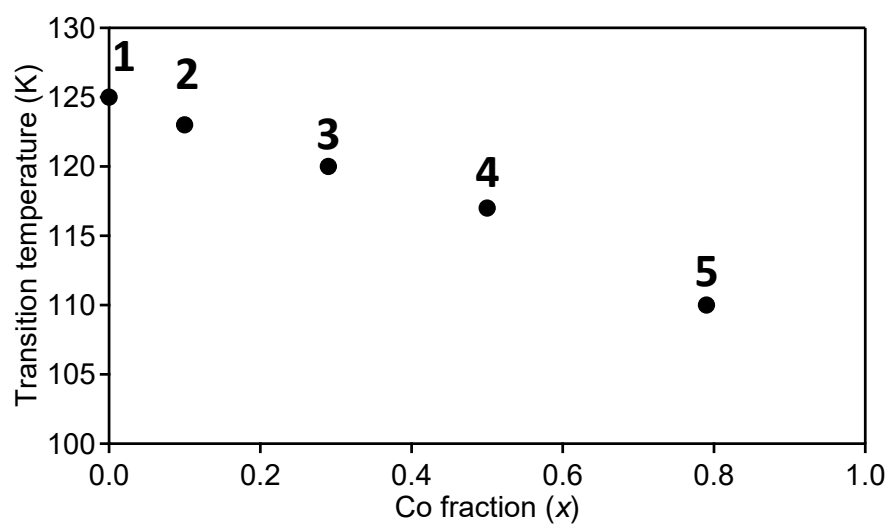

**Figure S2.** Cobalt fraction ( $x$ ) dependence of the spin-crossover transition temperature of **1–5**.
